# Supplementary material for: Probabilistic Inference of Biochemical Reactions in Microbial Communities from Metagenomic Sequences
Source: PLOS journal article supplement (doi:10.1371/journal.pcbi.1002981), 2013-03-21
Supplement: S1 (10.1371/journal.pcbi.1002981.s001) [file journal.pcbi.1002981.s001]

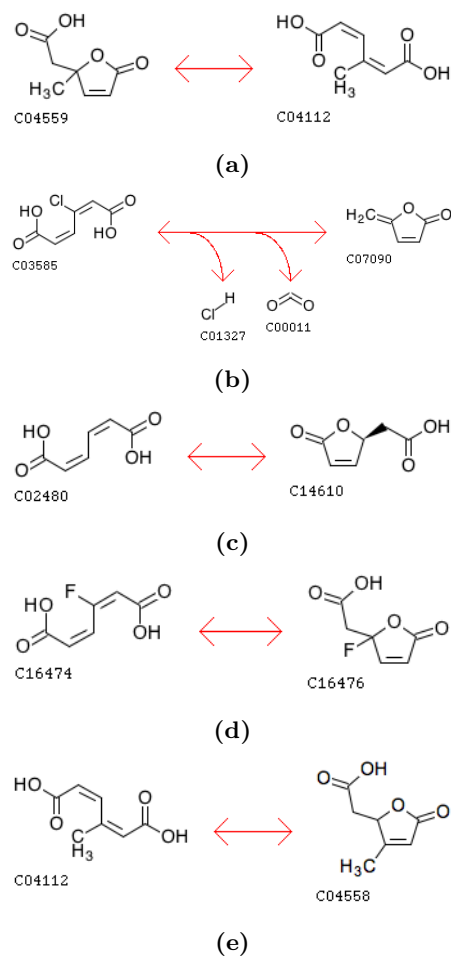

**Figure S1. Reactions catalyzed by muconate cycloisomerase (KEGG Oorthlog K01856).** All five reactions are found in all samples in the metagenomics samples from the Antarctic deep lake and Alaska permafrost studies. KEGG reactions: (a) R05300; (b) R05390; (c) R06989; (d) R08116; (e) R09229.
